# Supplementary material for: Prediction of Thrombotic and Bleeding Events After Percutaneous Coronary Intervention: CREDO‐Kyoto Thrombotic and Bleeding Risk Scores
Source: PubMed Central journal article supplement — J Am Heart Assoc. 2018 May 22;7(11):e008708. doi: 10.1161/JAHA.118.008708 (PMC6015347; doi:10.1161/jaha.118.008708), 2018-05-22
Supplement: JAH3-7-e008708-s001.pdf [file JAH3-7-e008708-s001.pdf]

# **SUPPLEMENTAL MATERIAL**

## **Appendix**

### **List of the participating centers and the investigators**

#### **List A. CREDO-Kyoto registry cohort-2**

Kyoto University Hospital: Takeshi Kimura

Kishiwada City Hospital: Mitsuo Matsuda, Hirokazu Mitsuoka

Tenri Hospital: Yoshihisa Nakagawa

Hyogo Prefectural Amagasaki Hospital: Hisayoshi Fujiwara, Yoshiki Takatsu, Ryoji Taniguchi

Kitano Hospital: Ryuji Nohara

Koto Memorial Hospital: Tomoyuki Murakami, Teruki Takeda

Kokura Memorial Hospital: Masakiyo Nobuyoshi, Masashi Iwabuchi

Maizuru Kyosai Hospital: Ryozo Tatami

Nara Hospital, Kinki University Faculty of Medicine: Manabu Shirotani

Kobe City Medical Center General Hospital: Toru Kita, Yutaka Furukawa, Natsuhiko Ehara

Nishi-Kobe Medical Center: Hiroshi Kato, Hiroshi Eizawa

Kansai Denryoku Hospital: Katsuhisa Ishii

Osaka Red Cross Hospital: Masaru Tanaka

University of Fukui Hospital: Jong-Dae Lee, Akira Nakano

Shizuoka City Shizuoka Hospital: Akinori Takizawa

Hamamatsu Rosai Hospital: Masaaki Takahashi

Shiga University of Medical Science Hospital: Minoru Horie, Hiroyuki Takashima

Japanese Red Cross Wakayama Medical Center: Takashi Tamura

Shimabara Hospital: Mamoru Takahashi

Kagoshima University Medica and Dental Hospital: Chuwa Tei, Shuichi Hamasaki

Shizuoka General Hospital: Hirofumi Kambara, Osamu Doi, Satoshi Kaburagi

Kurashiki Central Hospital: Kazuaki Mitsudo, Kazushige Kadota

Mitsubishi Kyoto Hospital: Shinji Miki, Tetsu Mizoguchi

Kumamoto University Hospital: Hisao Ogawa, Seigo Sugiyama

Shimada Municipal Hospital: Ryuichi Hattori, Takeshi Aoyama, Makoto Araki

Juntendo University Shizuoka Hospital: Satoru Suwa

**List B. RESET Trial**

Caress Sapporo Tokeidai Memorial Hospital: Kazushi Urasawa, Ryoji Koshida

Teine Keijinkai Hospital: Mitsugu Hirokami

Cardio-vascular Center Hokkaido Ohno Hospital: Takehiro Yamashita, Masato Nagashima

Caress Sapporo Hokko Memorial Hospital: Yoichi Nozaki

Hokkaido Social Insurance Hospital: Keiichi Igarashi, Jungo Furuya

Aomori Prefectural Central Hospital: Fuminobu Yoshimachi, Yukinori Sakamoto

Iwate Prefectural Central Hospital: Akihiro Nakamura, Shigefumi Fukui

Iwate Medical University Hospital: Tomonori Itoh

Sendai Kosuei Hospital: Naoto Inoue, Kaname Takizawa

Tohoku Kousei Nenkin Hospital: Yoshiaki Katahira, Takao Nakano

Sendai Open Hospital: Atsushi Kato

Iwaki Kyoritsu General Hospital: Yoshito Yamamoto, Tomohiro Tada

Fukushima Medical University Hospital: Yasuchika Takeishi, Kazuhiko Nakazato

Hoshi General Hospital: Mikihiro Kijima, Yuichi Ujiie

Ohta Nishinouchi Hospital: Nobuo Komatsu, Goro Ishida

Saiseikai Kurihashi Hospital: Yoshimi Ota, Atsushi Honda

Saitama Cardiovascular And Respiratory Center: Makoto Muto, Tetsuya Ishikawa

Dokkyo Medical University Koshigaya Hospital: Takaaki Komatsu

Jikei University Kashiwa Hospital: Mitsuyuki Shimizu, Yoshiki Uehara

Juntendo University Hospital: Hiroyuki Daida, Katsumi Miyauchi

Sakakibara Memorial Hospital: Tetsuya Sumiyoshi, Ryuta Asano

NTT Medical Center Tokyo: Masao Yamasaki

The Cardiovascular Institute Hospital: Junji Yajima, Ryuichi Funada

Mitsui Memorial Hospital: Kengo Tanabe, Masanori Taniwaki

Tokyo Medical University Hospital: Nobuhiro Tanaka, Masashi Ogawa

Teikyo University Hospital: Akiyoshi Miyazawa, Ken Kozuma, Nobuaki Suzuki

Tokyo Women's Medical University Hospital: Nobuhisa Hagiwara, Fumiaki Mori

The Jikei University Hospital: Takayuki Ogawa, Kazuo Ogawa

Juntendo University Nerima Hospital: Masataka Sumiyoshi, Shinya Okazaki

Tokyo Metropolitan Hiroo General Hospital: Tamotsu Tejima, Yasuhiro Tanabe

St. Luke's International Hospital: Yutaro Nishi

Itabashi Chuo General Hospital: Hiroshi Ohta

Saiseikai Yokohama-city Eastern Hospital: Toshiya Muramatsu, Hiroshi Ishimori

Yokohama Rosai Hospital: Kenichi Kato, Kazuhiko Yumoto

Tokai University Hospital: Yoshihiro Morino

Yokohama City University Medical Center: Kazuo Kimura, Kiyoshi Hibi

Kitasato University Hospital: Taiki Tojo, Takao Shimohama

Kanazawa Cardiovascular Hospital: Masanobu Namura, Yuki Horita

University of Fukui Hospital: Jong-Dae Lee, Akira Nakano

Fukui Cardio Vascular Center: Sumio Mizuno, Katsushi Misawa

Juntendo University Shizuoka Hospital: Satoru Suwa

Shizuoka City Shizuoka Hospital: Tomoya Onodera, Ryosuke Takeuchi

Shizuoka General Hospital: Osamu Doi, Satoshi Kaburagi

Okamura Memorial Hospital: Yasuhiro Tarutani

Seirei Hamamatsu General Hospital: Hisayuki Okada

Hamamatsu Medical Center: Masakazu Kobayashi, Yohei Takayama

Toyohashi Heart Center: Takahiko Suzuki, Masashi Kimura

Aichi Medical University Hospital: Takayuki Ito, Hiroaki Takashima

Tosei General Hospital: Hiroshi Asano

Nagoya Daini Red Cross Hospital: Haruo Hirayama, Mamoru Nanasato, Yasushi Tatematsu

Toyota Memorial Hospital: Hisashi Umeda

Nagoya Kyoritsu Hospital: Toru Aoyama

Fujita Health University Hospital: Yukio Ozaki, Hiroyuki Naruse

Matsusaka Chuo General Hospital: Masatoshi Miyahara

Nagai Hospital: Kozo Hoshino

Mie University Hospital: Takashi Tanigawa

Mie Heart Center: Hideo Nishikawa, Hiroyuki Suzuki

Yokkaichi Social Insurance Hospital: Masaki Kawamura

Koto Memorial Hospital: Teruki Takeda

Shiga University of Medical Science Hospital: Takashi Yamamoto

Kyoto University Hospital: Takeshi Kimura, Hiroki Shiomi

Mitsubishi Kyoto Hospital: Shinji Miki, Tetsu Mizoguchi

National Hospital Organization Kyoto Medical Center: Mitsuru Abe

Kyoto Second Red Cross Hospital: Hiroshi Fujita

Sakurabashi Watanabe Hospital: Kenji Fujii

Osaka City General Hospital: Akira Itoh, Kazuhiro Osawa

Osaka Saiseikai Noe Hospital: Shunsuke Take, Shiho Koyama

Osaka City University Hospital: Minoru Yoshiyama, Satoshi Nishimura

Osaka Red Cross Hospital: Tsukasa Inada, Fujio Hayashi

National Cerebral and Cardiovascular Center: Hiroshi Nonogi, Eiji Tada

Sumitomo Hospital: Yuji Yasuga, Nobuhiro Mitsusada

Higashisumiyoshi Morimoto Hospital: Yuji Sakanoue

Kansai Denryoku Hospital: Katsuhisa Ishii, Kazuaki Kataoka

Kobe City Medical Center General Hospital: Makoto Kinoshita

Kobe University Hospital: Junya Shite, Hirotoshi Hariki

Kansai Rosai Hospital: Masaaki Uematsu, Masaki Awata

Hyogo Prefectural Amagasaki Hospital: Yoshiki Takatsu, Ryoji Taniguchi

Hyogo College of Medicine Hospital: Motomaru Masutani

Tenri Hospital: Yoshihisa Nakagawa, Hirokazu Kondo



Nara Medical University Hospital: Shiro Uemura, Kenichi Ishigami

Japanese Red Cross Society Wakayama Medical Center: Takashi Tamura, Hiroki Sakamoto

Wakayama Medical University Hospital: Takashi Akasaka, Hironori Kitabata

Tottori University Hospital: Masahiko Kato, Yoshiyuki Furuse

Matsue Red Cross Hospital: Kinya Shirota, Asao Mimura

The Sakakibara Heart Institute of Okayama: Keizou Yamamoto, Hiroyuki Takinami

Kurashiki Central Hospital: Kazushige Kadota, Hiroyuki Tanaka

Kawasaki Medical School Hospital: Hiroyuki Okura, Yoji Neishi

Okayama University Hospital: Hiroshi Ito, Yoshiki Hata

Hiroshima City Hospital: Masaharu Ishihara, Kazuoki Dai

Fukuyama Cardiovascular Hospital: Seiichi Haruta, Hideo Takebayashi

Tsuchiya General Hospital: Mamoru Toyofuku

Chikamori Hospital: Kazuya Kawai, Shuichi Seki

University Of Occupational And Environmental Health Japan: Shinjo Sonoda, Yoshitaka

Muraoka

Kurume University Hospital: Takafumi Ueno, Seiji Kanaya

Kokura Memorial Hospital: Masashi Iwabuchi, Shinichi Shirai

Kouseikai Hospital: Yoshihiro Iwasaki

Saiseikai Kumamoto Hospital: Koichi Nakao

Kumamoto Rousai Hospital: Toshiyuki Matsumura, Sei Nakata

Miyazaki Medical Association Hospital: Yoshisato Shibata, Nehiro Kuriyama

Kagoshima Medical Center: Hitoshi Nakashima, Yasuhisa Iriki

**List C. NEXT Trial**

Caress Sapporo Tokeidai Memorial Hospital: Kazushi Urasawa, Ryoji Koshida

Oji General Hospital: Katsuhisa Ishii, Nobuo Kato

Hokkaido Junkanki Hospital: Daisuke Hotta, Masaru Yamaki

Teine Keijinkai Hospital: Mitsugu Hirokami

Cardio-vascular Center Hokkaido Ohno Hospital: Takehiro Yamashita, Masato Nagashima

Caress Sapporo Hokko Memorial Hospital: Yoichi Nozaki

Japan Community Health Care Organization Hokkaido Hospital: Keiichi Igarashi, Jungo Furuya

Aomori Prefectural Central Hospital: Fuminobu Yoshimachi, Dai Miura, Yoshihisa Aida,

Yukinori Sakamoto, Atsushi Konta

Iwate Prefectural Central Hospital: Akihiro Nakamura, Shigefumi Fukui, Sohta Nakajima

Iwate Medical University Hospital: Tetsuya Fusazaki

Tohoku Pharmaceutical University Hospital: Yoshiaki Katahira, Takao Nakano

Sendai Open Hospital: Atsushi Kato, Toru Takii

Iwaki Kyoritsu General Hospital: Yoshito Yamamoto, Tomohiro Tada

Fukushima Medical University Hospital: Yasuchika Takeishi, Kazuhiko Nakazato

Saiseikai Kurihashi Hospital: Yoshimi Ota, Atsushi Honda

Saitama Cardiovascular and Respiratory Center: Tetsuya Ishikawa, Takuro Fujii

Dokkyo Medical University Koshigaya Hospital: Takaaki Komatsu

New Tokyo Hospital: Sunao Nakamura, Naoyuki Kurita

Juntendo University Hospital: Hiroyuki Daida, Katsumi Miyauchi

Sakakibara Memorial Hospital: Itaru Takamisawa

NTT Medical Center Tokyo: Masao Yamasaki

The Cardiovascular Institute Hospital: Junji Yajima, Shingo Tanaka, Ryuichi Funada, Nobuhiro

Murata

Mitsui Memorial Hospital: Kengo Tanabe, Yoshifumi Nakajima

Tokyo Medical University Hospital: Nobuhiro Tanaka, Masashi Ogawa, Naotaka Murata

Teikyo University Hospital: Ken Kozuma, Nobuaki Suzuki

Tokyo Women's Medical University Hospital: Nobuhisa Hagiwara, Fumiaki Mori, Junichi

Yamaguchi

Juntendo University Nerima Hospital: Masataka Sumiyoshi, Kenji Inoue, Shinya Okazaki

Itabashi Chuo Medical Center: Hiroshi Ohta

Saiseikai Yokohama-city Eastern Hospital: Toshiya Muramatsu, Hiroshi Ishimori

Kanto Rosai Hospital: Atsuo Namiki

Yokohama Rosai Hospital: Kenichi Kato, Kazuhiko Yumoto

Tokai University Hospital: Nobuhiko Ogata, Shou Torii

Yokohama City University Medical Center: Kazuo Kimura, Kiyoshi Hibi

Kitasato University Hospital: Taiki Tojo, Takao Shimohama

Kanazawa Cardiovascular Hospital: Masanobu Namura, Yuki Horita

University of Fukui Hospital: Jong-Dae Lee, Hiroyasu Uzui, Akira Nakano

Fukui Cardiovascular Center: Sumio Mizuno, Katsushi Misawa

Ogaki Municipal Hospital: Hiroaki Mukawa, Yohei Shibata, Kazushi Terada

Juntendo University Shizuoka Hospital: Satoru Suwa

Shizuoka General Hospital: Osamu Doi, Hideaki Moriwaki, Hiroki Sakamoto

Okamura Memorial Hospital: Yasuhiro Tarutani

Seirei Hamamatsu General Hospital: Hisayuki Okada

Hamamatsu Medical Center: Masakazu Kobayashi, Terumori Sato, Yohei Takayama

Aichi Medical University Hospital: Hiroaki Takashima, Takayuki Ito, Amano Tetsuya

Tosei General Hospital: Masayoshi Ajioka, Yosuke Murase, Yusuke Sakamoto

Toyota Memorial Hospital: Hisashi Umeda, Kazutaka Hayashi

Fujita Health University Hospital: Yukio Ozaki, Hiroyuki Naruse

Japanese Red Cross Nagoya Daini Hospital: Haruo Hirayama, Yasushi Tatematsu, Hiroki Kamiya

Chubu Rosai Hospital: Tetsuya Amano, Tomohiro Yoshida, Tadayuki Uetani

Nagai Hospital: Kozo Hoshino

Mie University Hospital: Takashi Tanigawa, Toshiki Sawai

Mie Heart Center: Hideo Nishikawa, Hiroyuki Suzuki

Japan Community Health Care Organization Yokkaichi Hazu Medical Center: Masaki Kawamura,

Takashi Yamanaka

Koto Memorial Hospital: Teruki Takeda

Shiga University of Medical Science Hospital: Takashi Yamamoto

Kyoto University Hospital: Takeshi Kimura, Masahiro Natsuaki, Hou Heigen, Hirotooshi

Watanabe

Mitsubishi Kyoto Hospital: Shinji Miki, Tetsu Mizoguchi, Masashi Kato

National Hospital Organization Kyoto Medical Center: Masaharu Akao, Mitsuru Abe

Kyoto Second Red Cross Hospital: Hiroshi Fujita

Osaka University Hospital: Shinsuke Nanto, Masahiro Kumada, Kouichi Tachibana, Keita

Okayama

Sakurabashi Watanabe Hospital: Kenshi Fujii

Osaka City General Hospital: Akira Itoh, Takahiro Naruko, Kei Yunoki

Osaka Saiseikai Noe Hospital: Shunsuke Take, Yoshihiro Kato, Shiho Koyama

Osaka City University Hospital: Takao Hasegawa, Tomokazu Iguchi

Osaka Red Cross Hospital: Tsukasa Inada, Fujio Hayashi

National Cerebral and Cardiovascular Center Hospital: Hiroki Sakamoto, Satoshi Yasuda

Sumitomo Hospital: Yuji Yasuga, Nobuhiro Mitsusada

Higashisumiyoshi Morimoto Hospital: Yuji Sakanoue

Bell Land General Hospital: Toru Kataoka

Kobe City Medical Center General Hospital: Natsuhiko Ehara

Kobe University Hospital: Toshihiro Shinke, Takumi Inoue, Junya Shite, Akihide Konishi

Kansai Rosai Hospital: Masaki Awata, Takayuki Ishihara

Hyogo Prefectural Amagasaki Hospital: Yoshiki Takatsu, Ryoji Taniguchi

Hyogo College of Medicine Hospital: Motomaru Masutani, Masaharu Ishihara

Tenri Hospital: Yoshihisa Nakagawa, Toshihiro Tamura

Japanese Red Cross Society Wakayama Medical Center: Takashi Tamura, Yuichi Kawase,

Mamoru Toyofuku

Wakayama Medical University Hospital: Takashi Akasaka, Yasushi Ino, Hironori Kitabata

Tottori University Hospital: Masahiko Kato, Yoshiyuki Furuse

Matsue Red Cross Hospital: Kinya Shirota

The Sakakibara Heart Institute of Okayama: Atsushi Hirohata, Eiki Hirose

Kurashiki Central Hospital: Kazushige Kadota, Seiji Habara

Kawasaki Medical School Hospital: Hiroyuki Okura, Yoji Neishi

Hiroshima City Hospital: Masaharu Ishihara, Yasuharu Nakama

Fukuyama Cardiovascular Hospital: Hideo Takebayashi, Kenji Goto

Tsuchiya General Hospital: Nobuo Shiode, Masaya Otsuka, Mamoru Toyofuku

Iwakuni Clinical Center: Satoru Sakuragi

Chikamori Hospital: Kazuya Kawai, Shuichi Seki

University of Occupational and Environmental Health Japan: Shinjo Sonoda, Yoshitaka Muraoka



Fukuoka Wajiro Hospital: Taro Saito, Yoritaka Otsuka

Kurume University Hospital: Takafumi Ueno, Yoshiaki Mitsutake, Hidetoshi Chibana

Kokura Memorial Hospital: Masashi Iwabuchi, Shinichi Shirai

Kouseikai Hospital: Yoshihiro Iwasaki, Masahiko Ishizaki

Saiseikai Kumamoto Hospital: Koichi Nakao, Shinzo Miyamoto

National Hospital Organization Kumamoto Medical Center: Kazuteru Fujimoto

Kumamoto Rousai Hospital: Toshiyuki Matsumura, Takuo Tsurugi

Miyazaki Medical Association Hospital: Yoshisato Shibata, Nehiro Kuriyama

Tenyokai Central Hospital: Hiroshi Yamaguchi, Junichiro Takaoka, Nobuhiko Atsuchi

National Hospital Organization Kagoshima Medical Center: Hitoshi Nakashima, Tetsuro Kataoka,

Keisuke Kusumoto

## **List of clinical research coordinators**

### **Research Institute for Production Development**

Saori Tezuka, Yumika Fujino, Misato Yamauchi, Naoko Okamoto, Miya Hanazawa, Risa Kato, Miyuki Tsumori, Masayo Kitamura, Itsuki Yamazaki, Chikako Hibi, Yuki Sato, Satoko Nishida, Yui Kinoshita, Hitomi Sasae, Yuriko Uchida, Asuka Takahashi, Emi Takinami, Yuko Yamamoto, Mai Yoshimoto, Izumi Miki, Asuka Saeki, Sachiko Maeda, Saeko Minematsu.
